# Supplementary material
Source: HighWire-hosted journal article supplement (http://jneurosci.org/highwire/filestream/599447/field_highwire_adjunct_files/4/table_3.pdf)
Supplement: table_3.pdf [file table_3.pdf]

| <b>Effect</b>         | <b>Type</b>       | <b>F</b>            | <b>p</b>     |
|-----------------------|-------------------|---------------------|--------------|
| Self                  | Main effect       | $F_{(1,13)} = 4.7$  | $p = 0.01^*$ |
| aMTT $\times$ Self    | Interaction       | $F_{(2,26)} = 1.0$  | $p = 0.32$   |
| aMTT $\times$ rMTT    | Interaction       | $F_{(2,26)} = 0.9$  | $p = 0.41$   |
| aMTT: Past vs. Now    | Scheffe Post-hocs |                     | 0.06         |
| aMTT: Past vs. Future | Scheffe Post-hocs |                     | 0.22         |
| aMTT: Now vs. Future  | Scheffe Post-hocs |                     | 0.04*        |
| rMTT- Past:           | Post-hoc tests    | $F_{(1,13)} = 5.3$  | 0.04*        |
| rMTT - Now:           | Post-hoc tests    | $F_{(1,13)} = 5.1$  | 0.04*        |
| rMTT - Future:        | Post-hoc tests    | $F_{(1,13)} = 6.4$  | 0.03*        |
| <b>GFP</b>            |                   |                     |              |
| aMTT                  | Main effect       | $F_{(2,26)} = 0.6$  | $p = 0.56$   |
| rMTT                  | Main effect       | $F_{(1,13)} = 5.3$  | $p = 0.03^*$ |
| aMTT $\times$ rMTT    | Interaction       | $F_{(2,26)} = 0.98$ | $p = 0.39$   |

Supplementary Table 3. Statistical results and post-hoc tests for MTT-map.
